# Supplementary material for: A novel two-photon fluorescent probe for hydrogen sulfide in living cells using an acedan–NBD amine dyad based on FRET process with high selectivity and sensitivity
Source: Royal Society of Chemistry journal article supplement (doi:10.1039/c7nj01080j), 2017-01-01
Supplement: c7nj01080j1.pdf [file c7nj01080j1.pdf]

*Supporting Information for*

**A Novel Two-photon Fluorescent Probe for Hydrogen Sulfide in Living Cells using an Acedan–NBD amine Dyad Based on FRET Process with High Selectivity and Sensitivity**

Yao Tang, Guo-Fang Jiang\*

*\*State Key Lab of Chemo/Biosensing and Chemometrics, College of Chemistry and Chemical Engineering, Hunan University, Changsha 410082, P. R. China*

*E-mail: [gfjiang@hnu.edu.cn](mailto:gfjiang@hnu.edu.cn)*

## **Additional spectra**

|                           |    |
|---------------------------|----|
| Fig. S1.....              | S3 |
| Fig. S2.....              | S3 |
| Fig. S3.....              | S4 |
| Fig. S4.....              | S4 |
| Fig. S5 NMR spectra.....  | S5 |
| Fig. S6 NMR spectra.....  | S6 |
| Fig. S7 NMR spectra.....  | S7 |
| Fig. S8 Mass spectra..... | S7 |

*Measurement of two-photon cross section.* The two-photon cross section ( $\sigma$ ) was determined by using a femtosecond (fs) fluorescence measurement technique. **L** was dissolved in EtOH-phosphate buffer solution (PBS, 25 mM, pH 7.4, containing 20% EtOH as co-solvent), at a concentration of  $5.0 \times 10^{-6}$  M and then the two-photon fluorescence intensity was measured at 720-800 nm by using Rhodamine B in MeOH as the standard, whose two-photon property has been well characterized in the literature.<sup>[1]</sup> The two-photon cross-section was calculated by using  $\sigma = \sigma_r(F_t n_t^2 \Phi_r C_r) / (F_r n_r^2 \Phi_t C_s)$ , where the subscripts t and r stand for the sample and reference molecules. F is the average fluorescence intensity integrated from TPE imaging, n is the refractive index of the solvent, C is the concentration,  $\Phi$  is the quantum yield, and  $\sigma_r$  is the two-photon cross-section of the reference molecule.

[1] N. S. Makarov, M. Drobizhev, A. Rebane, *Opt. Exp.* **2008**, 16, 4029-4047.

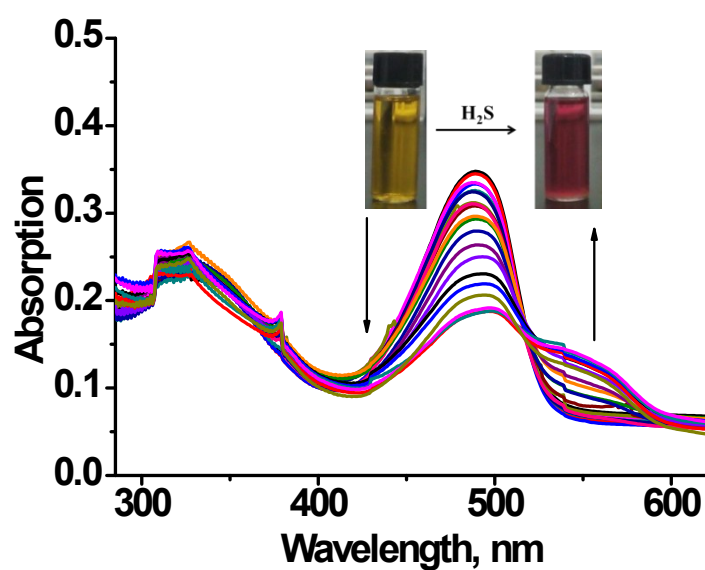

Fig. S1 Absorption spectra of **L** (5  $\mu\text{M}$ ) with  $\text{H}_2\text{S}$  (0-140.0 equiv.) in EtOH-phosphate buffer solution (PBS, 25 mM, pH 7.4, containing 20% EtOH as co-solvent) at 25  $^\circ\text{C}$ . Inset: visual color of the probe **L** in the absence (yellow) or presence (pink) of  $\text{H}_2\text{S}$  under visible light.

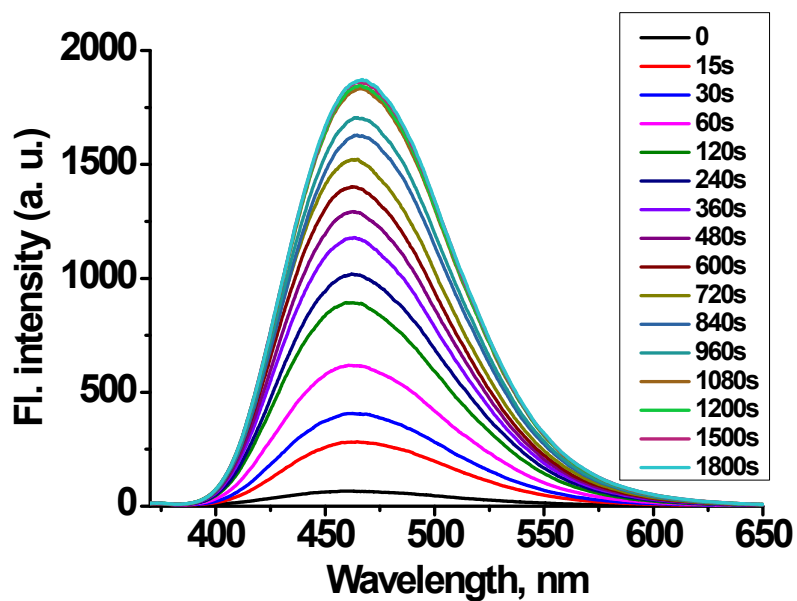

Fig. S2 Fluorescence spectra of probe **L** (5  $\mu\text{M}$ ) upon reaction with  $\text{H}_2\text{S}$  (700  $\mu\text{M}$ ) at 25  $^\circ\text{C}$  at different reaction times as shown inset.

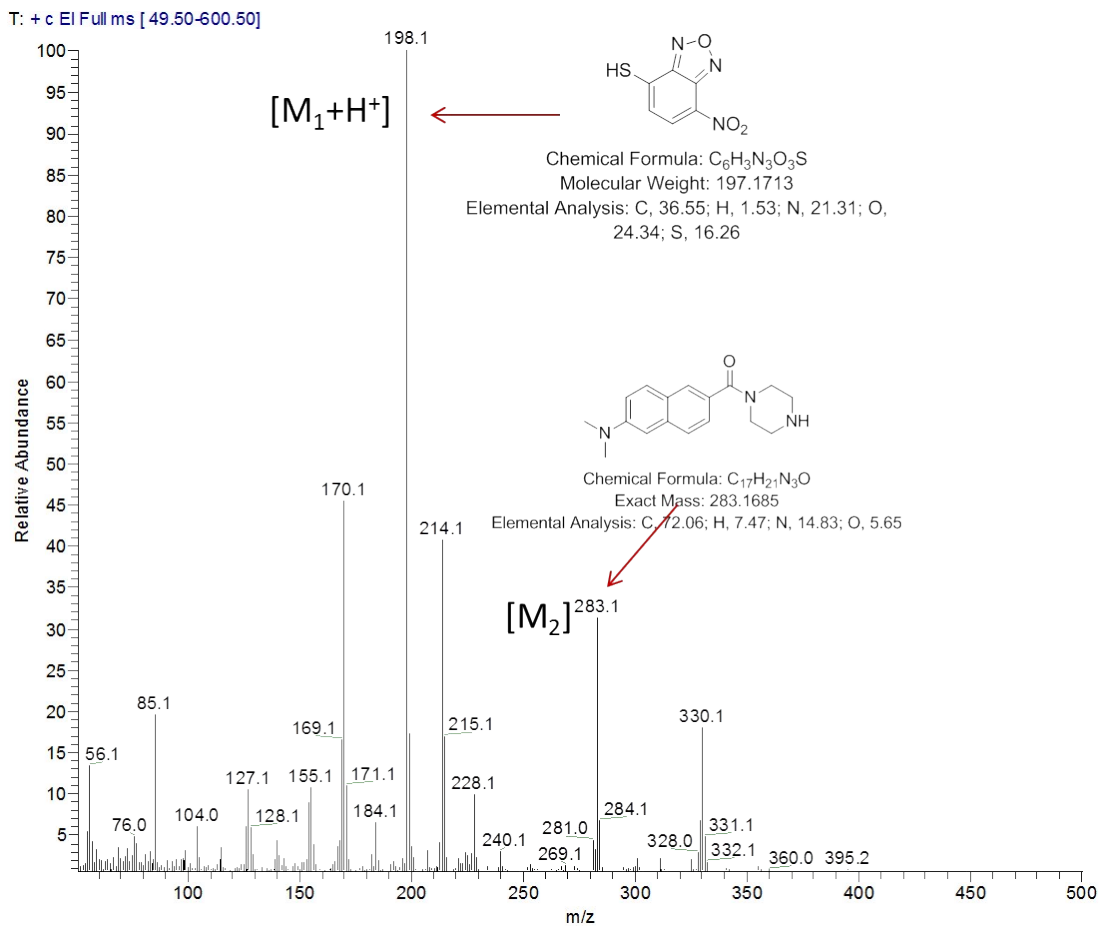

Fig. S3 EI-MS spectrum of the reaction of probe **L** with  $H_2S$ .

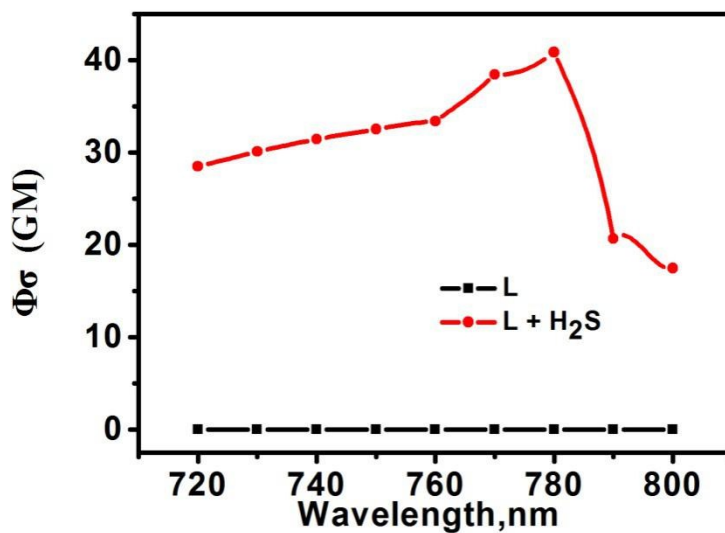

Fig. S4. Two-photon action spectra of Probe **L** (5  $\mu M$ ) and **L** with 250  $\mu M$   $H_2S$  in EtOH-phosphate buffer solution (PBS, 25 mM, pH 7.4, containing 20% EtOH as co-solvent).

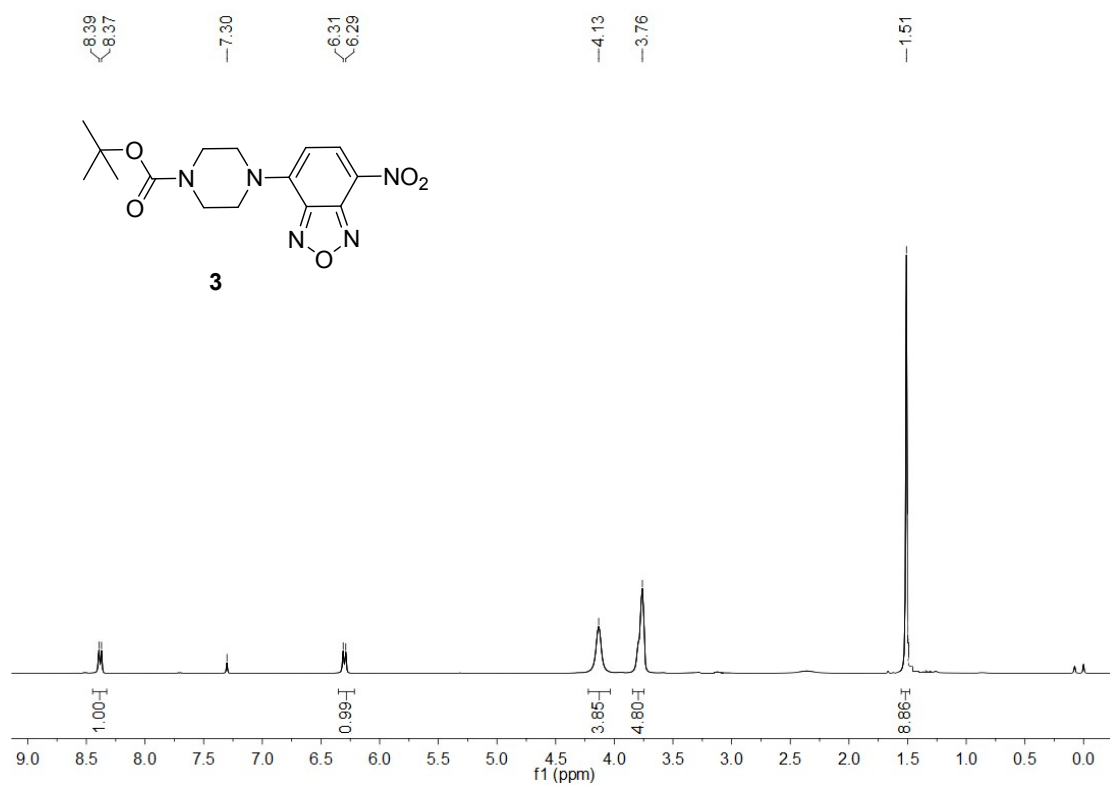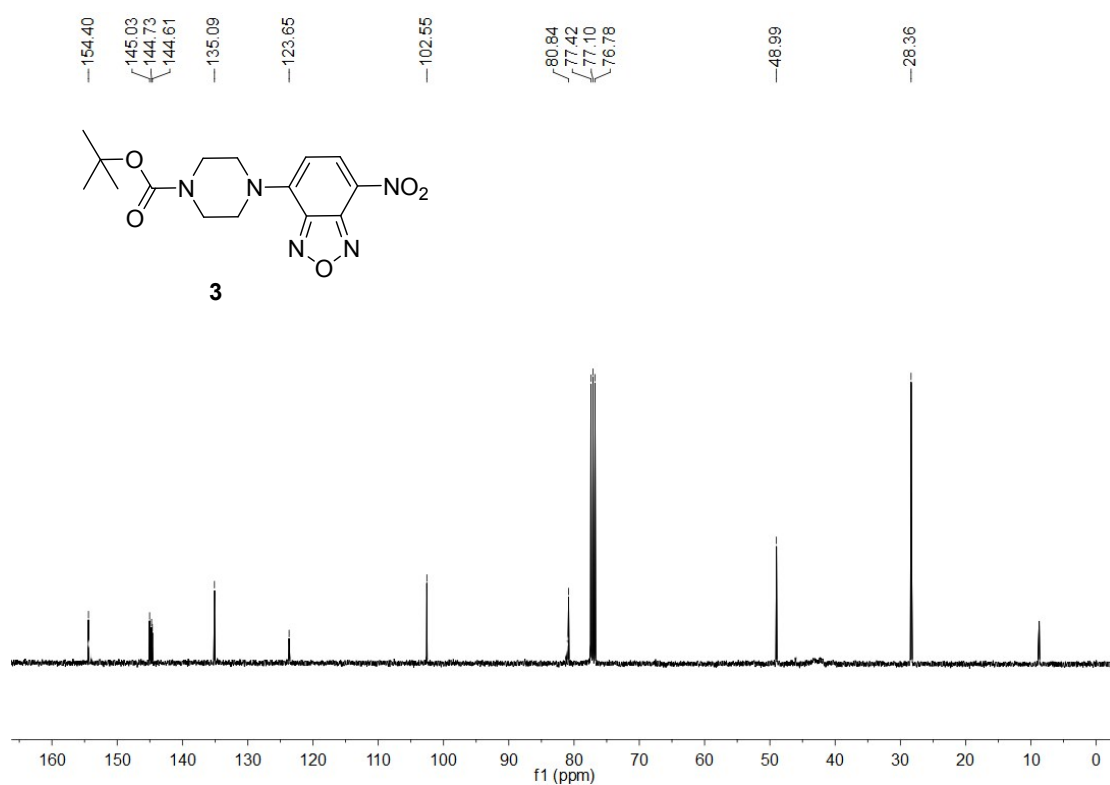

Fig. S5 The  $^1\text{H}$  NMR and  $^{13}\text{C}$  NMR spectrometry of **3**.

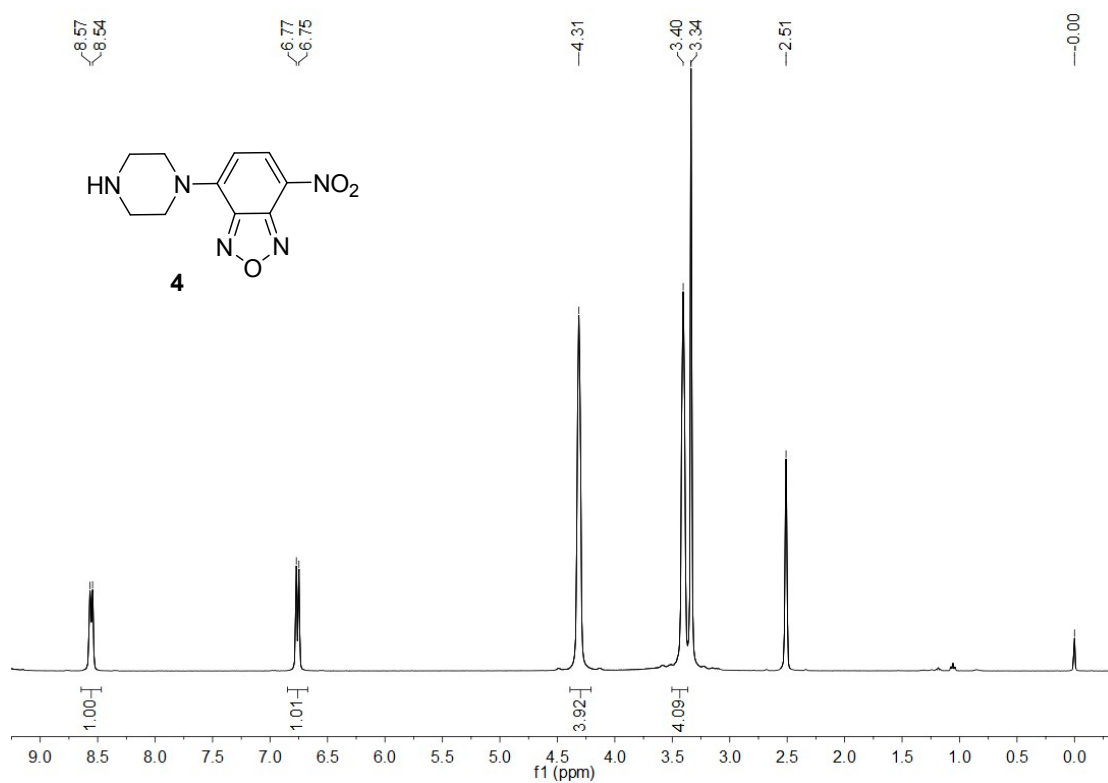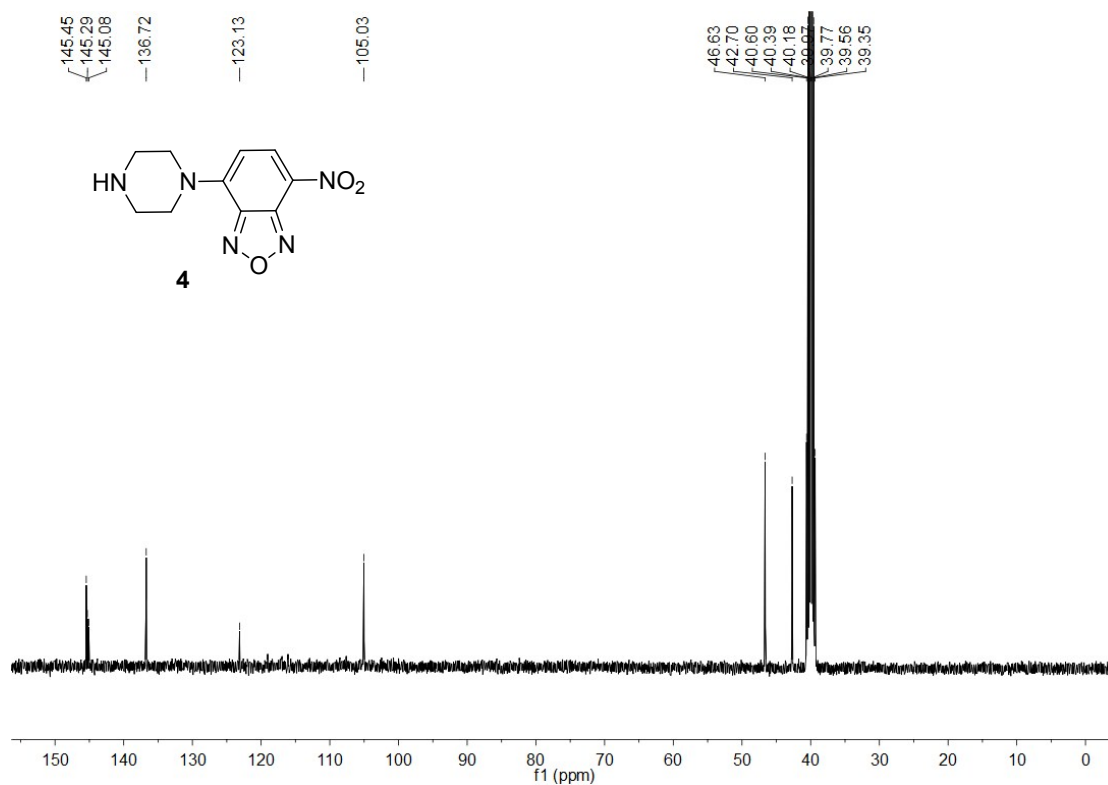

Fig. S6 The  $^1\text{H}$  NMR and  $^{13}\text{C}$  NMR spectrometry of **4**.

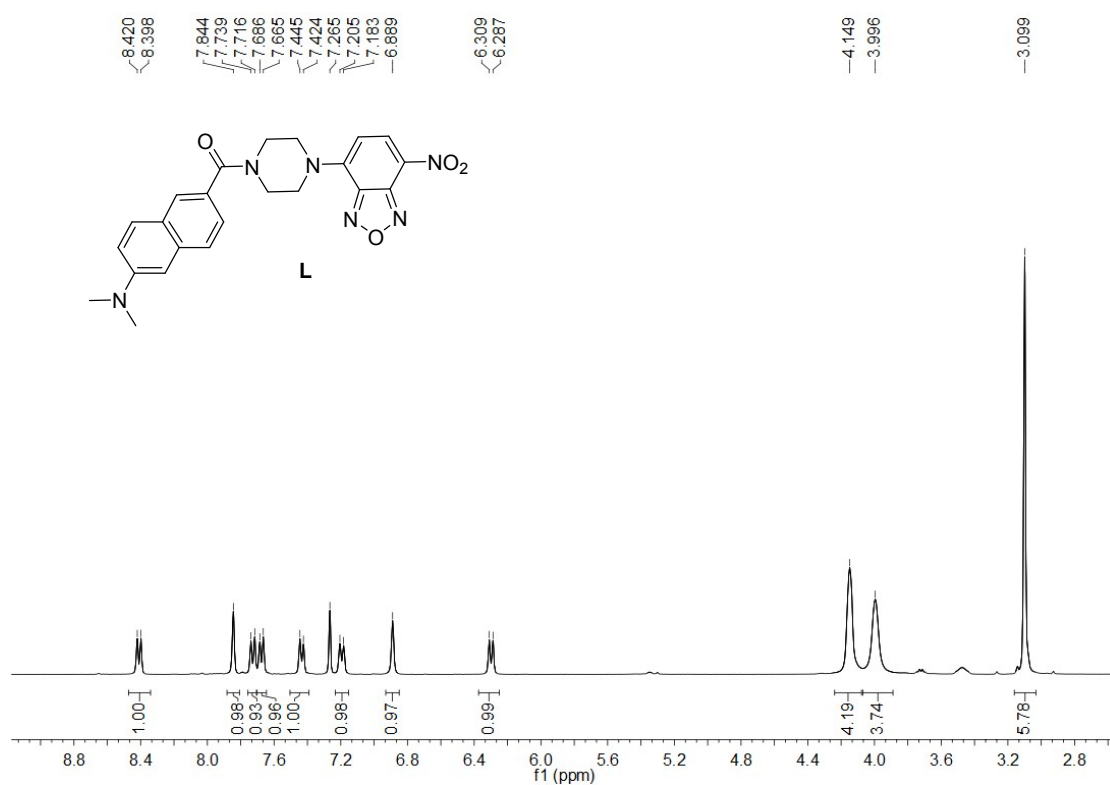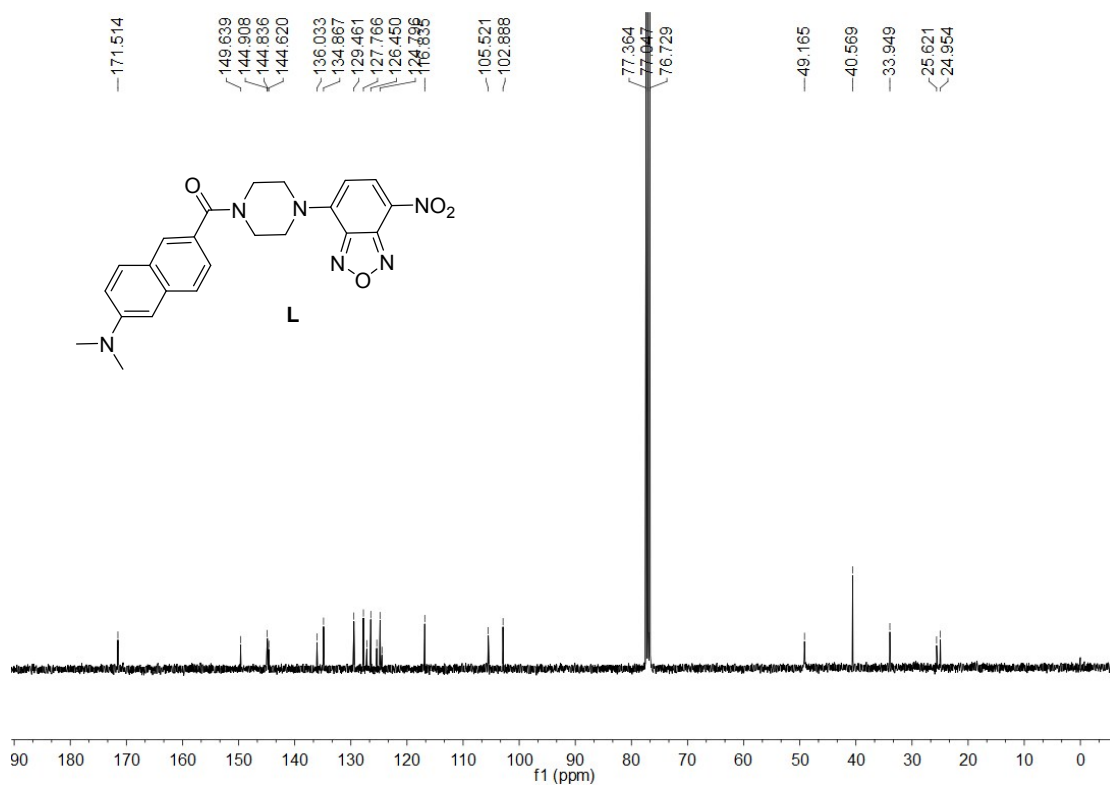

Fig. S7 The  $^1\text{H}$  NMR and  $^{13}\text{C}$  NMR spectrometry of probe **L**.



File : C:\xcalibur\data\ty-170512-446-hr-av2.RAW  
 Full ms [410.500 - 467.500 ] - Range: 410.500 - 467.500  
 Scan No. 1 of 1

| Mass    | Relative Intensity | Theoretical Mass | Delta [ppm] | Delta [mmu] | Composition                                                   |
|---------|--------------------|------------------|-------------|-------------|---------------------------------------------------------------|
| 446.171 | 100.0              | 446.1697         | 3.9         | 1.7         | C <sub>23</sub> H <sub>22</sub> O <sub>4</sub> N <sub>6</sub> |
|         |                    | 446.1737         | -5.1        | -2.3        | C <sub>28</sub> H <sub>27</sub> O <sub>2</sub> N <sub>4</sub> |
|         |                    | 446.1751         | -8.1        | -3.6        | C <sub>30</sub> H <sub>24</sub> O <sub>3</sub> N <sub>1</sub> |
|         |                    | 446.1665         | 11.0        | 4.9         | C <sub>34</sub> H <sub>22</sub> O <sub>1</sub>                |
|         |                    | 446.1652         | 14.0        | 6.3         | C <sub>32</sub> H <sub>20</sub> N <sub>3</sub>                |

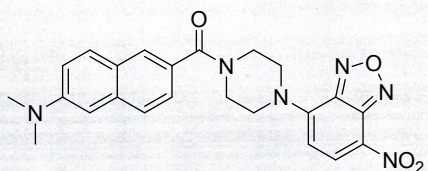

Chemical Formula: C<sub>23</sub>H<sub>22</sub>N<sub>6</sub>O<sub>4</sub>  
 Exact Mass: 446.1703  
 Elemental Analysis: C, 61.87; H, 4.97; N, 18.82; O, 14.33

Fig. S8 The The HREI mass spectrometry of probe L.
